# Supplementary material
Source: bioRxiv or medRxiv preprint supplement (https://www.biorxiv.org/content/biorxiv/early/2020/07/07/2020.07.07.191841/DC1/embed/media-1.pdf)
Supplement: Supplementary file [file media-1.pdf]

1  
2  
3  
4  
5  
6  
7  
8  
9  
10  
11  
12  
13  
14  
15  
16  
17

## Supplementary Materials for

### Cricket genomes: the genomes of future food

Guillem Ylla, Taro Nakamura, Takehiko Itoh, Rei Kajitani, Atsushi Toyoda, Sayuri Tomonari,  
Tetsuya Bando, Yoshiyasu Ishimaru, Takahito Watanabe, Masao Fuketa, Yuji Matsuoka,  
Sumihare Noji, Taro Mito, Cassandra G. Extavour

These Supplementary Materials consist of the following:

- Supplementary Figures 1 – 4 (this document)
- Supplementary File 1 (this document)
- Supplementary File 2 (“Supplementary\_File\_2\_GeneExpansions.xls”)
- Supplementary Table 1 (“Supplementary\_Table\_1\_GenomeStats.xls”)
- Supplementary Table 2 (this document)
- Supplementary Table 3 (“Supplementary\_Table\_3\_TablePpkExpression.xls”)
- Supplementary Table 4 (this document)
- Supplementary References (this document)

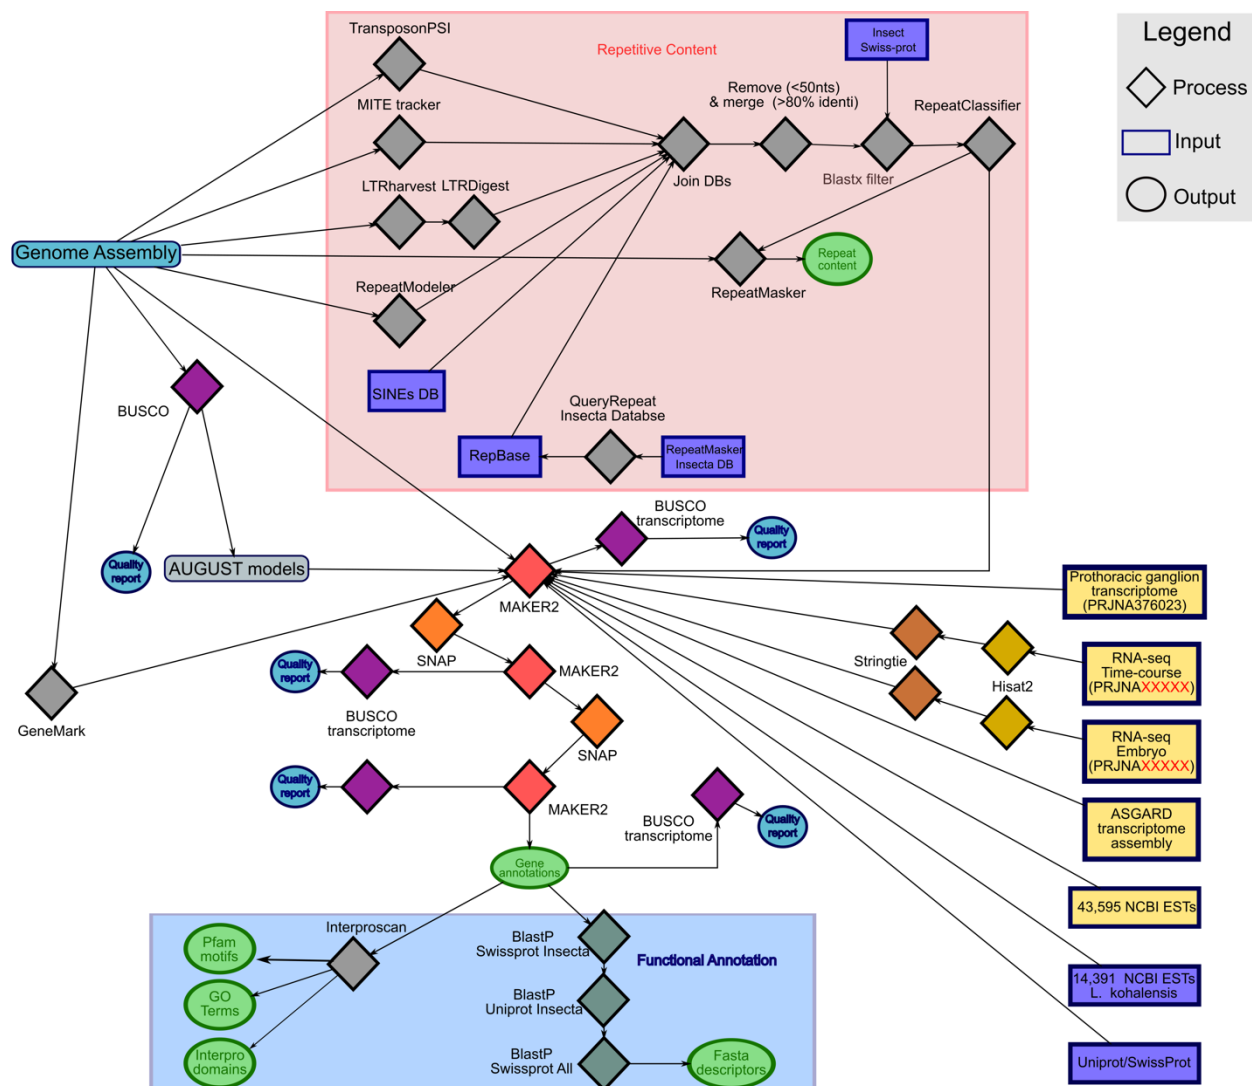

18  
19  
20  
21  
22  
23  
24  
25  
26

**Supplementary Figure 1: Schematic of *G. bimaculatus* genome annotation pipeline.**

Rectangles represent data inputs: yellow rectangles represent *G. bimaculatus* data; purple rectangles represent data from other species or databases. Diamonds represent computational processes: gray diamonds indicate processes executed a single time; non-gray diamonds of the same color indicate the same process. Circles indicate outputs: blue circles indicate quality controls; green circles indicate annotations. Scripts available at GitHub [https://github.com/guillemylla/Crickets\\_Genome\\_Annotation](https://github.com/guillemylla/Crickets_Genome_Annotation).

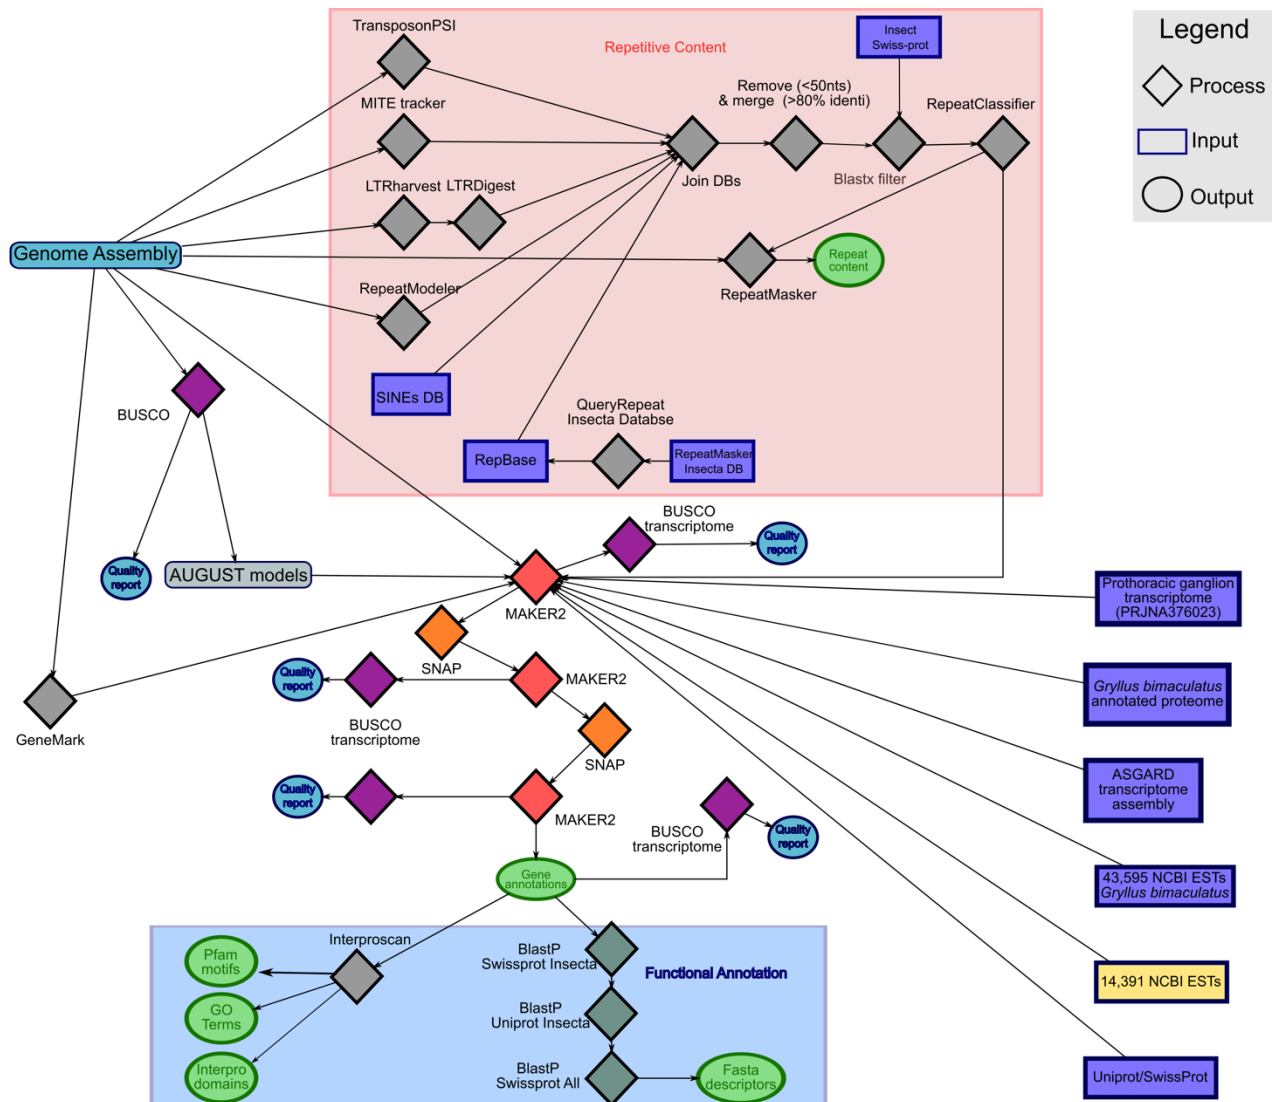

27  
28  
29  
30

**Supplementary Figure 2: Scheme of *L. kohalensis* genome annotation pipeline. All symbols as per Supplementary Figure 1.**

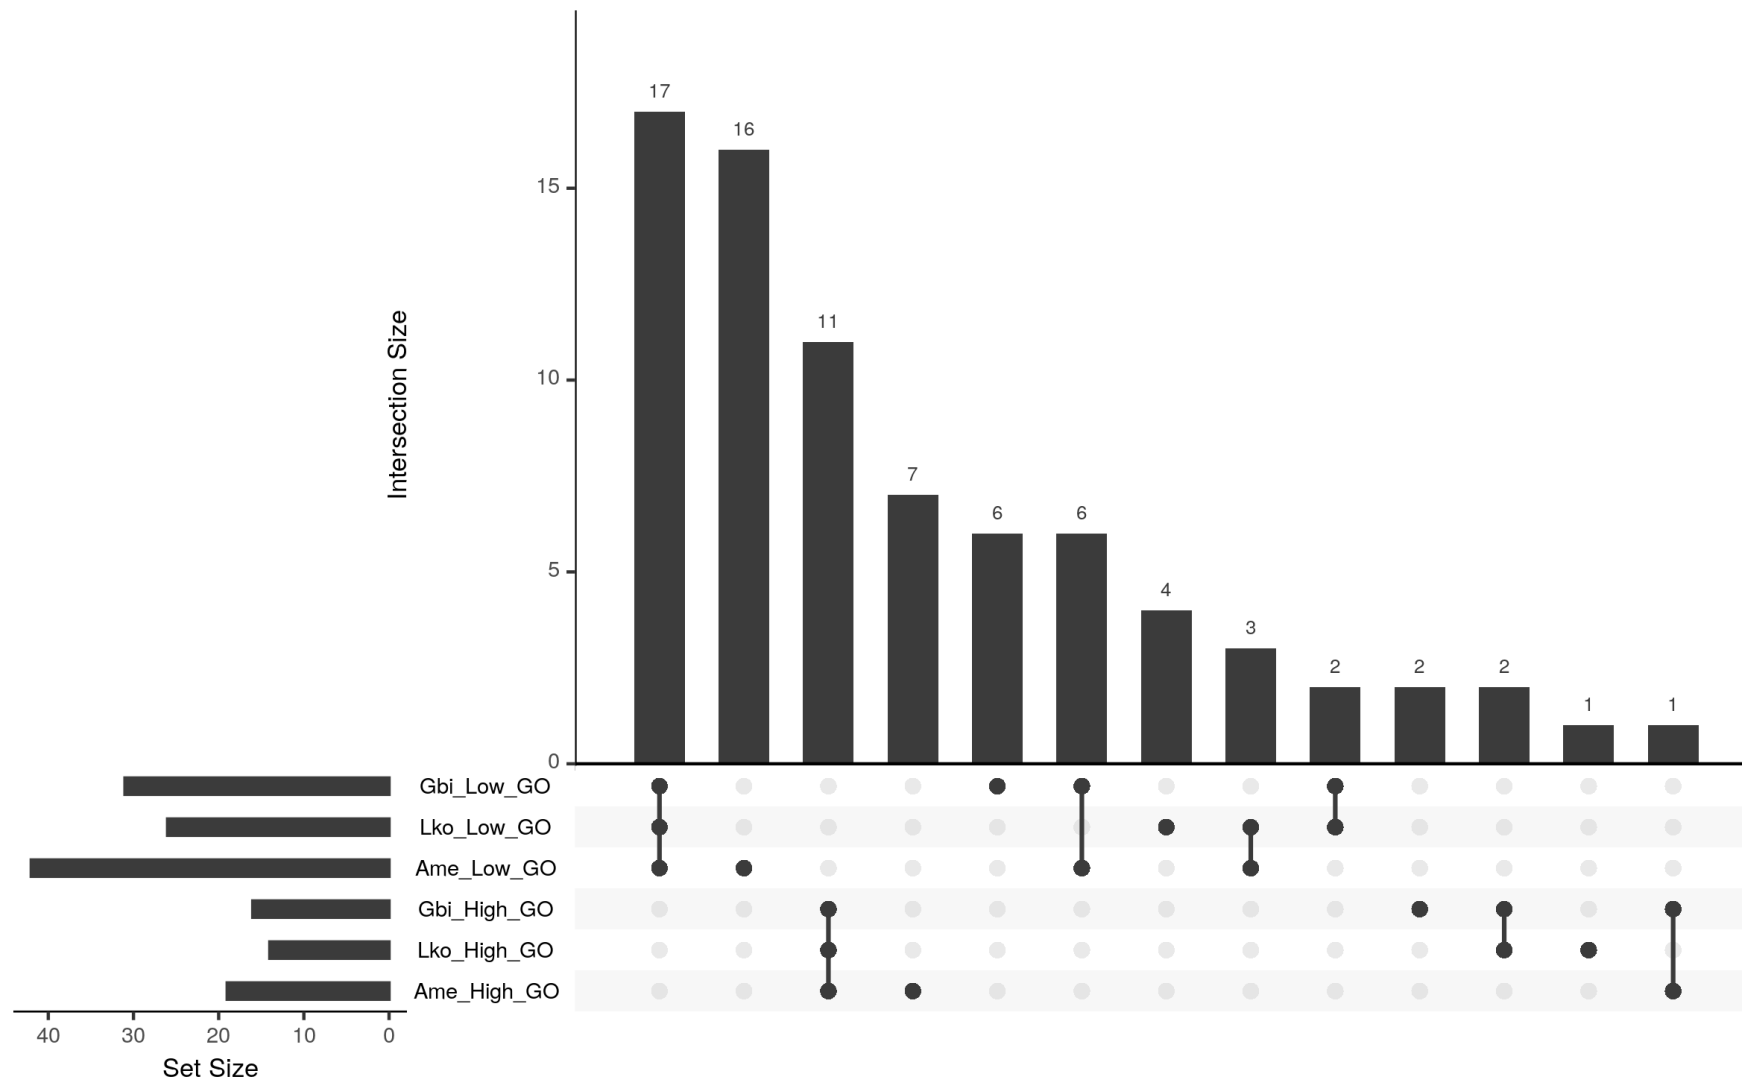

31  
32  
33  
34

**Supplementary Figure 3: UpSet plot of enriched GO-terms among genes with unusually high or low CpG levels.** This plot shows the intersections between the enriched GO-terms of six different categories, which are the high CpG<sub>o/e</sub> and low CpG<sub>o/e</sub> genes for each of *G. bimaculatus* (Gbi), *L. kohalensis* (Lko) and *A. mellifera* (Ame).

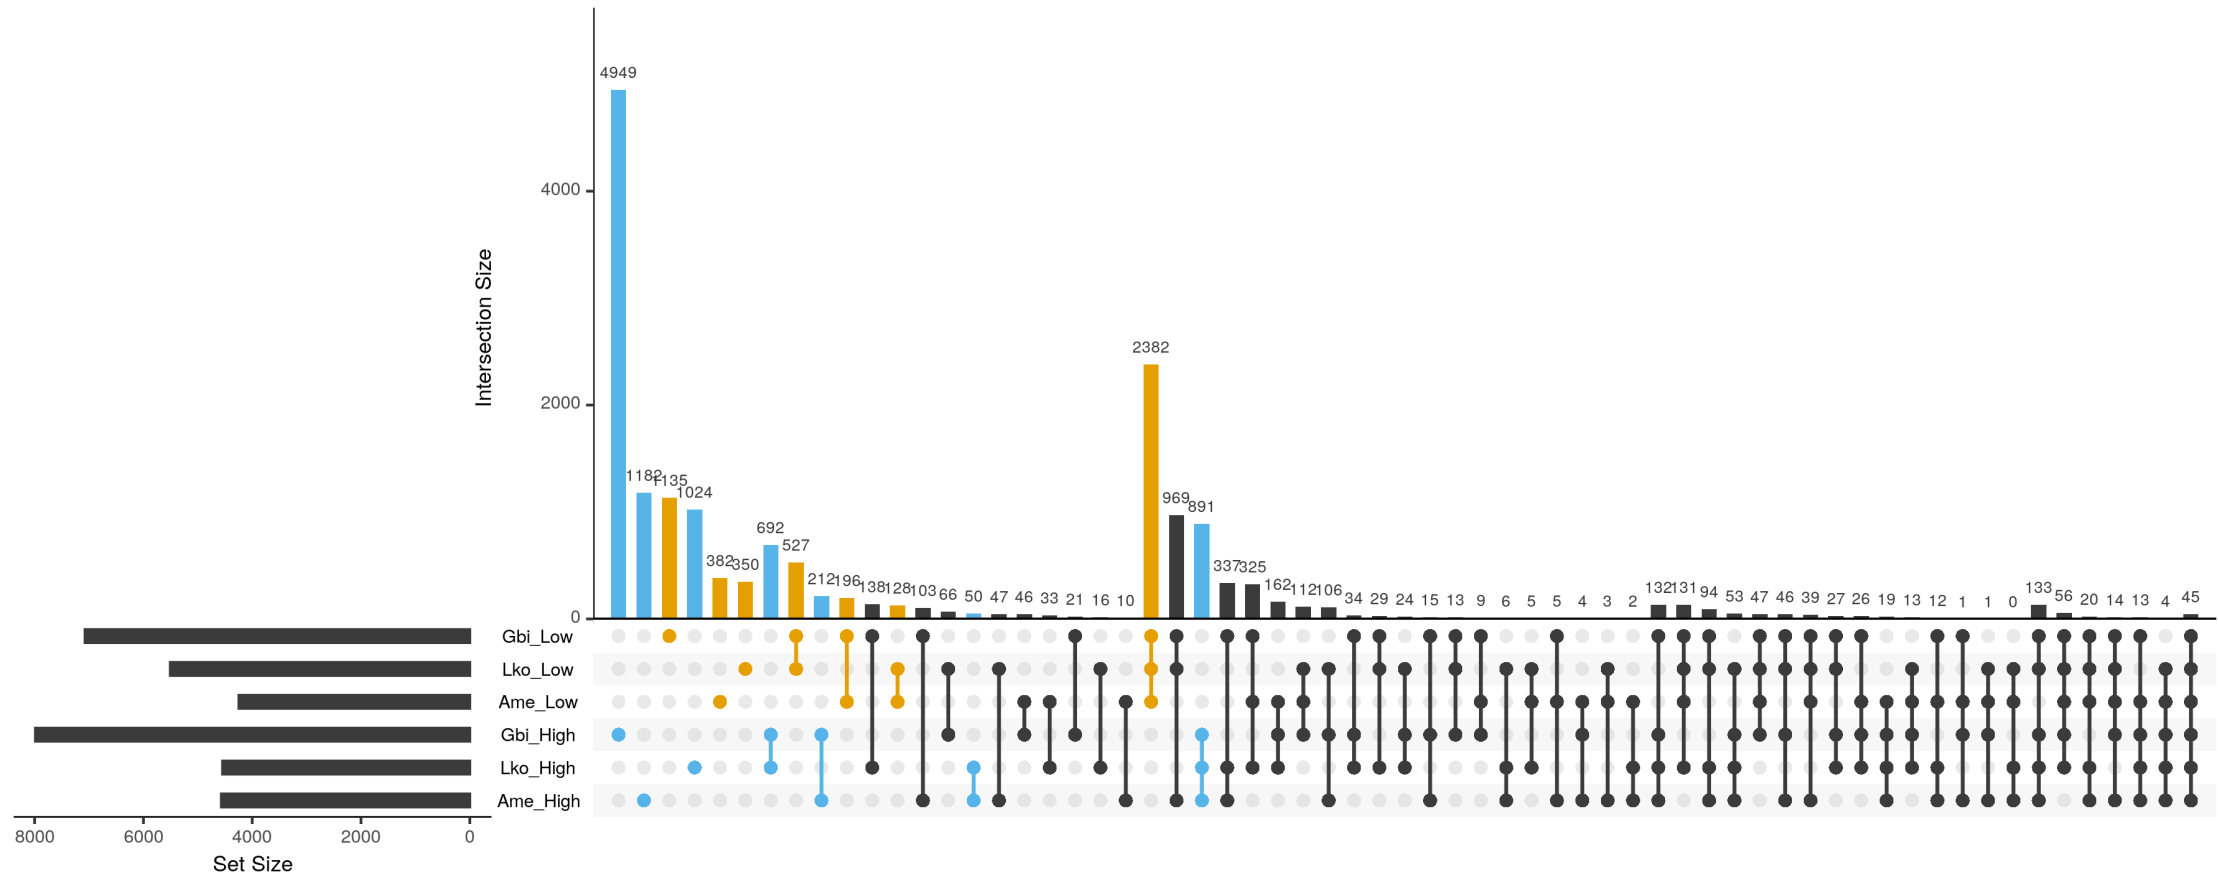

35  
36  
37  
38  
39

**Supplementary Figure 4: UpSet plot of orthologous genes in crickets and honeybees.** Complete UpSet plot (all combinations are shown) of the number of orthogroups (OGs) that are common across the different the 6 different categories, which are the high CpG<sub>o/e</sub> and low CpG<sub>o/e</sub> genes for *G. bimaculatus* (Gbi), *L. kohalensis* (Lko) and *A. mellifera* (Ame).

40 **Supplementary File 1: RepeatMasker summaries.** Report of the repeat content in the genomes  
 41 of *G. bimaculatus* and *L. kohalensis* generated by RepeatMasker using custom libraries.  
 42

### *Gryllus bimaculatus*

```
=====
file name: Gbimaculatus_Gap_filled.fasta
sequences:          47877
total length: 1658007496 bp (1601517380 bp excl N/X-runs)
GC level:          39.93 %
bases masked: 558652201 bp ( 33.69 %)
=====
```

|                             | number of<br>elements* | length<br>occupied | percentage<br>of sequence |
|-----------------------------|------------------------|--------------------|---------------------------|
| SINEs:                      | 138895                 | 26406967 bp        | 1.59 %                    |
| ALUs                        | 6                      | 9564 bp            | 0.00 %                    |
| MIRs                        | 0                      | 0 bp               | 0.00 %                    |
| LINEs:                      | 454301                 | 147302087 bp       | 8.88 %                    |
| LINE1                       | 1803                   | 826764 bp          | 0.05 %                    |
| LINE2                       | 115576                 | 32029561 bp        | 1.93 %                    |
| L3/CR1                      | 18286                  | 6358119 bp         | 0.38 %                    |
| LTR elements:               | 131656                 | 36970251 bp        | 2.23 %                    |
| ERV1                        | 92                     | 44183 bp           | 0.00 %                    |
| ERV1-MaLRs                  | 0                      | 0 bp               | 0.00 %                    |
| ERV_classI                  | 11451                  | 2441461 bp         | 0.15 %                    |
| ERV_classII                 | 980                    | 401749 bp          | 0.02 %                    |
| DNA elements:               | 500741                 | 142828465 bp       | 8.61 %                    |
| hAT-Charlie                 | 11512                  | 4094376 bp         | 0.25 %                    |
| TcMar-Tigger                | 2039                   | 537995 bp          | 0.03 %                    |
| Unclassified:               | 367653                 | 126552078 bp       | 7.63 %                    |
| Total interspersed repeats: |                        | 480059848 bp       | 28.95 %                   |
| Small RNA:                  | 2562                   | 1002728 bp         | 0.06 %                    |
| Satellites:                 | 31087                  | 7528498 bp         | 0.45 %                    |
| Simple repeats:             | 769175                 | 77632578 bp        | 4.68 %                    |
| Low complexity:             | 85129                  | 6215377 bp         | 0.37 %                    |

### *Laupala kohalensis*

```
=====
file name: GCA_002313205.1_ASM231320v1_genomic.fna
sequences:          148784
total length: 1595214429 bp (1563778341 bp excl N/X-runs)
GC level:          35.58 %
=====
```

43  
44

bases masked: 566518287 bp ( 35.51 %)

```

=====

```

|                             | number of<br>elements* | length<br>occupied | percentage<br>of sequence |
|-----------------------------|------------------------|--------------------|---------------------------|
| -----                       |                        |                    |                           |
| SINEs:                      | 29510                  | 7083717 bp         | 0.44 %                    |
| ALUs                        | 304                    | 101257 bp          | 0.01 %                    |
| MIRs                        | 1248                   | 430584 bp          | 0.03 %                    |
| LINEs:                      | 1035151                | 322470849 bp       | 20.21 %                   |
| LINE1                       | 941                    | 367057 bp          | 0.02 %                    |
| LINE2                       | 584526                 | 167380843 bp       | 10.49 %                   |
| L3/CR1                      | 10257                  | 4624100 bp         | 0.29 %                    |
| LTR elements:               | 57347                  | 29690552 bp        | 1.86 %                    |
| ERVL                        | 231                    | 43500 bp           | 0.00 %                    |
| ERVL-MaLRs                  | 0                      | 0 bp               | 0.00 %                    |
| ERV_classI                  | 1821                   | 585650 bp          | 0.04 %                    |
| ERV_classII                 | 389                    | 125302 bp          | 0.01 %                    |
| DNA elements:               | 189815                 | 62384975 bp        | 3.91 %                    |
| hAT-Charlie                 | 15008                  | 5154516 bp         | 0.32 %                    |
| TcMar-Tigger                | 8896                   | 2459752 bp         | 0.15 %                    |
| Unclassified:               | 409303                 | 128822550 bp       | 8.08 %                    |
| Total interspersed repeats: |                        | 550452643 bp       | 34.51 %                   |
| Small RNA:                  | 13816                  | 3005585 bp         | 0.19 %                    |
| Satellites:                 | 2088                   | 882748 bp          | 0.06 %                    |
| Simple repeats:             | 307925                 | 19782955 bp        | 1.24 %                    |
| Low complexity:             | 48386                  | 2381730 bp         | 0.15 %                    |
| =====                       |                        |                    |                           |

48  
49  
50  
51  
52  
53  
54  
55  
56  
57  
58  
59  
60  
61  
62  
63  
64  
65  
66  
67

**Supplementary File 2: Gene family expansions in crickets.** Gene families (Orthogroups) significantly expanded in the lineage leading to crickets (tab 1), expanded in *G. bimaculatus* (tab 2), and expanded in *L. kohalensis* (tab 3). For each expanded orthogroup (OG), we report the expansion size as the number of genes gained, and the functional information about the OG. The functional information consists of the list of PFAMs and GO terms associated with the genes within the OG, and the list of *D. melanogaster* genes within the OG with their FlyBase summaries.

See file "Supplementary\_File\_2\_GeneExpansions.xls"

**Supplementary Table 1: Genome assembly information for the 16 insect genomes analyzed.** For each genome, we show the database that the assembly was retrieved from, the assembly file name, the assembly statistics obtained with assembly-stats software (<https://github.com/sanger-pathogens/assembly-stats>) and the BUSCO v3.1.0 reports at Arthropoda and Insecta levels.

See file "Supplementary\_Table\_1\_GenomeStats.xls"



68 **Supplementary Table 2:** The orthogroups (OG) containing the 31 *D. melanogaster* pickpocket  
69 genes, with their FlyBase ID, symbol, and class according to Zelle et al. (2013).  
70

| OG           | Flybase ID  | Dmel symbol        | Zelle 2013 class |
|--------------|-------------|--------------------|------------------|
| OG0000361.fa | FBgn0034965 | <i>ppk29</i>       | I                |
| OG0000361.fa | FBgn0039424 | <i>ppk15</i>       | I                |
| OG0000361.fa | FBgn0051065 | <i>ppk31</i>       | I                |
| OG0000361.fa | FBgn0053508 | <i>ppk13</i>       | I                |
| OG0009052.fa | FBgn0032602 | <i>ppk17</i>       | V                |
| OG0000185.fa | FBgn0039675 | <i>ppk21</i>       | III              |
| OG0000185.fa | FBgn0039677 | <i>ppk30</i>       | III              |
| OG0000185.fa | FBgn0039679 | <i>ppk19</i>       | III              |
| OG0000185.fa | FBgn0065109 | <i>ppk11</i>       | IV               |
| OG0000185.fa | FBgn0039676 | <i>ppk20</i>       | III              |
| OG0000185.fa | FBgn0031802 | <i>ppk7</i>        | III              |
| OG0000185.fa | FBgn0031803 | <i>ppk14</i>       | III              |
| OG0000072.fa | FBgn0022981 | <i>rpk / ppk2</i>  | V                |
| OG0000072.fa | FBgn0034730 | <i>ppk12</i>       | V                |
| OG0000072.fa | FBgn0052792 | <i>ppk8</i>        | V                |
| OG0000072.fa | FBgn0053289 | <i>ppk5</i>        | V                |
| OG0000072.fa | FBgn0020258 | <i>ppk / ppk1</i>  | V                |
| OG0000072.fa | FBgn0265001 | <i>ppk18</i>       | IV               |
| OG0000072.fa | FBgn0030795 | <i>ppk28</i>       | V                |
| OG0000072.fa | FBgn0035785 | <i>ppk26</i>       | V                |
| OG0011276.fa | FBgn0035458 | <i>ppk27</i>       | IV               |
| OG0000243.fa | FBgn0034489 | <i>ppk6</i>        | IV               |
| OG0000243.fa | FBgn0039839 | <i>ppk24</i>       | IV               |
| OG0000243.fa | FBgn0051105 | <i>ppk22</i>       | IV               |
| OG0000243.fa | FBgn0065108 | <i>ppk16</i>       | IV               |
| OG0000243.fa | FBgn0024319 | <i>Nach / ppk4</i> | IV               |
| OG0000167.fa | FBgn0050181 | <i>ppk3</i>        | II               |
| OG0000167.fa | FBgn0053349 | <i>ppk25</i>       | II               |
| OG0000167.fa | FBgn0065110 | <i>ppk10</i>       | II               |
| OG0000167.fa | FBgn0085398 | <i>ppk9</i>        | II               |
| OG0000167.fa | FBgn0030844 | <i>ppk23</i>       | VI               |

71  
72

73 **Supplementary Table 3: *pickpocket* gene expression levels in the *G. bimaculatus* prothoracic**  
74 **ganglion.** Expression in FPKMs of *fruitless* and *ppk* genes in each RNA-seq library generated  
75 from adult male prothoracic ganglia previously generated by Fisher and colleagues (2018).  
76 Genes with read sum across samples > 5 FPKMs across samples are highlighted.  
77  
78 See file “Supplementary\_Table\_3\_TablePpkExpression.xls”  
79

80 **Supplementary Table 4: *pickpocket* genes present in previous QTL analyses examining the genetic basis for sound-based cricket courtship behavior variation.** Genomic  
 81 position information for the *L. kohalensis pickpocket* genes found in linkage groups (LG) in previously published QTL analyses (Blankers, Oh & Shaw 2018; Shaw & Lesnick, 2009)  
 82 examining mating song rhythm variations and female acoustic preference in the genus *Laupala*.  
 83

| Scaff names Shaw | Scaff Names    |  | start   | end     | width | strand | Name      | Ppk class | Table S3 and S6<br>(Blankers, Oh, & Shaw, 2018) |           | Table S4 (Blankers,<br>Oh, Bombarely, &<br>Shaw, 2018) | Table 2 (Xu<br>and Shaw,<br>2019) |
|------------------|----------------|--|---------|---------|-------|--------|-----------|-----------|-------------------------------------------------|-----------|--------------------------------------------------------|-----------------------------------|
|                  | NCBI           |  |         |         |       |        |           |           | LG                                              | proximity | LG                                                     | LG                                |
| Lko057S000409    | NNCF01126148.1 |  | 1083057 | 1116038 | 32982 | +      | Lko_01144 | Class IV  | 1                                               | LOD1      | 1                                                      |                                   |
| Lko057S000550    | NNCF01126289.1 |  | 666338  | 667949  | 1612  | -      | Lko_06470 | Class IV  | 3                                               | LOD2      |                                                        |                                   |
| Lko057S005538    | NNCF01131273.1 |  | 20948   | 31450   | 10503 | -      | Lko_31867 | Class V   | 4                                               | LOD1      |                                                        |                                   |
| Lko057S005538    | NNCF01131273.1 |  | 6676    | 8154    | 1479  | -      | Lko_31866 | Class V   | 4                                               | LOD1      |                                                        |                                   |
| Lko057S005538    | NNCF01131273.1 |  | 43198   | 60736   | 17539 | -      | Lko_31869 | Class V   | 4                                               | LOD1      |                                                        |                                   |
| Lko057S000206    | NNCF01125945.1 |  | 353321  | 357106  | 3786  | -      | Lko_06341 | Class III |                                                 |           |                                                        | 3                                 |
| Lko057S000206    | NNCF01125945.1 |  | 404113  | 432386  | 28274 | -      | Lko_06342 | Class III |                                                 |           |                                                        | 3                                 |

84  
85

86 **Supplementary References**

87

88 Blankers, T., Oh, K. P., Bombarely, A., & Shaw, K. L. (2018). The genomic architecture of a rapid  
89 Island radiation: Recombination rate variation, chromosome structure, and genome  
90 assembly of the hawaiian cricket *Laupala*. In *Genetics* (Vol. 209, pp. 1329-1344).

91

92 Blankers, T., Oh, K. P., & Shaw, K. L. (2018). The genetics of a behavioral speciation phenotype  
93 in an Island system. In *Genes* (Vol. 9, pp. 346)

94

95 Fisher, H. P., Pascual, M. G., Jimenez, S. I., Michaelson, D. A., Joncas, C. T., Quenzer, E. D., . . .  
96 Horch, H. W. (2018). De novo assembly of a transcriptome for the cricket *Gryllus*  
97 *bimaculatus* prothoracic ganglion: An invertebrate model for investigating adult central  
98 nervous system compensatory plasticity. In S. Allodi (Ed.), *PLoS One* (Vol. 13, pp.  
99 e0199070).

100

101 Shaw, K. L., & Lesnick, S. C. (2009). Genomic linkage of male song and female acoustic  
102 preference QTL underlying a rapid species radiation. In *Proceedings of the National*  
103 *Academy of Sciences* (Vol. 106, pp. 9737-9742).

104

105 Xu, M., & Shaw, K. L. (2019). The genetics of mating song evolution underlying rapid speciation:  
106 Linking quantitative variation to candidate genes for behavioral isolation. In *Genetics*  
107 (Vol. 211, pp. 1089-1104).

108

109 Zelle, K. M., Lu, B., Pyfrom, S. C., & Ben-Shahar, Y. (2013). The genetic architecture of  
110 degenerin/epithelial sodium channels in *Drosophila*. In *G3: Genes, Genomes, Genetics*  
111 (Vol. 3, pp. 441-450).

112

113
